# Supplementary material for: Developing an HbA1c-Based Equation to Estimate Blood Glucose in Maintenance Hemodialysis Patients
Source: Oxford University Press journal article supplement (doi:10.2337/dc12-1019), 2012-12-14

SUPPLEMENTARY DATA

**Supplementary Figure 1.** Relationship between mean HbA1c and BG in different HD

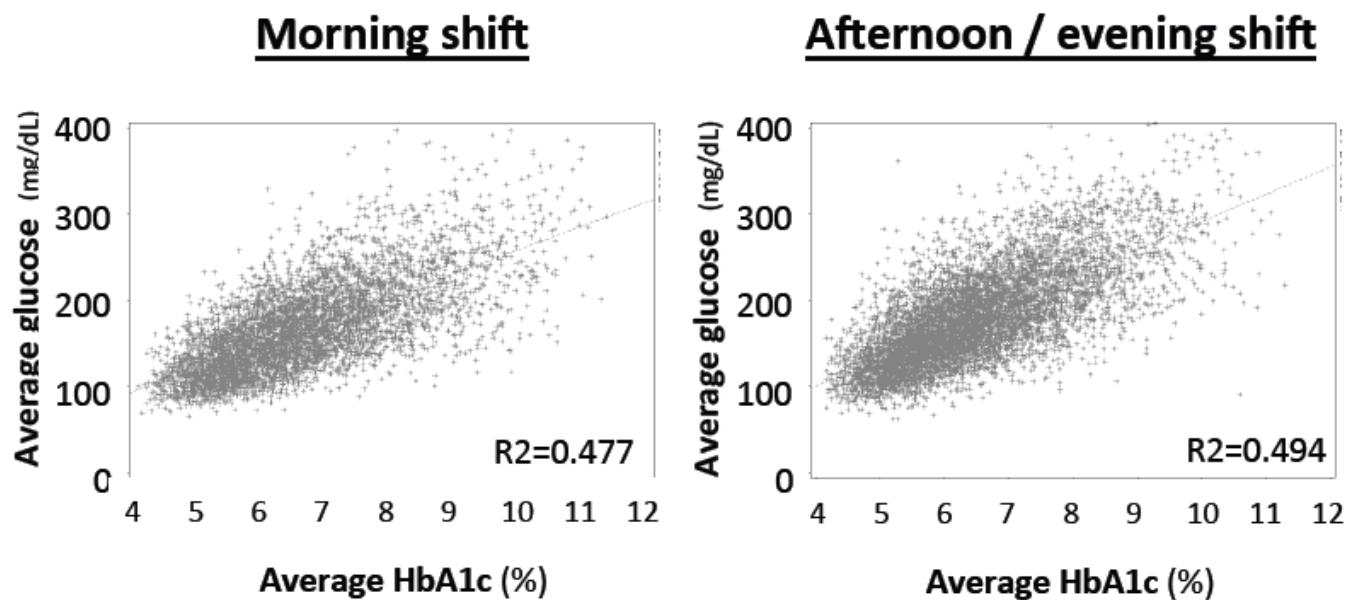

Supplement: dc121019supplementarydata.pdf [file dc121019supplementarydata.pdf]
